# Supplementary material for: Conservation and transmission of seed bacterial endophytes across generations following crossbreeding and repeated inbreeding of rice at different geographic locations
Source: PubMed Central journal article supplement (PMC6436425; doi:10.1002/mbo3.662), 2018-06-10

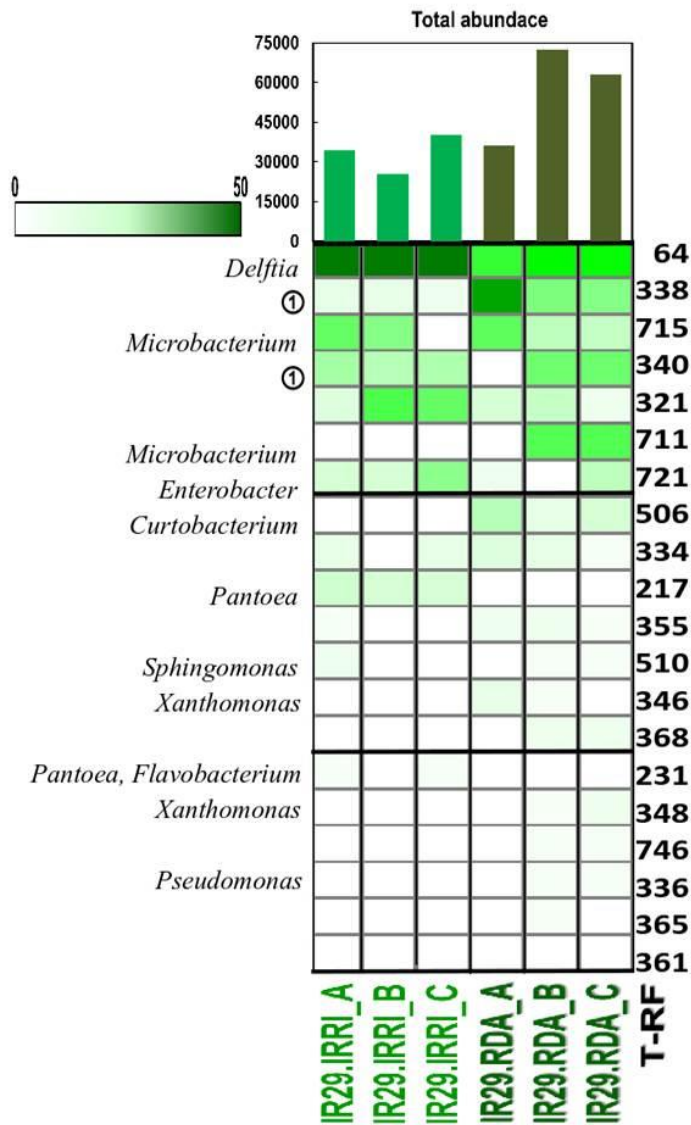

Sorensen's Index - 0.67  
Transmission % - 50

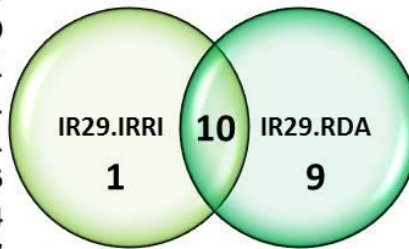

Sorensen's Index - 0.89  
Transmission % - 80.0

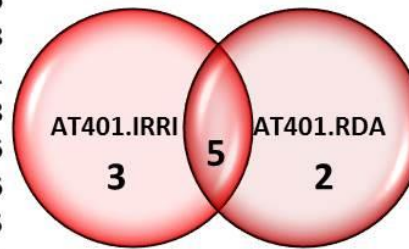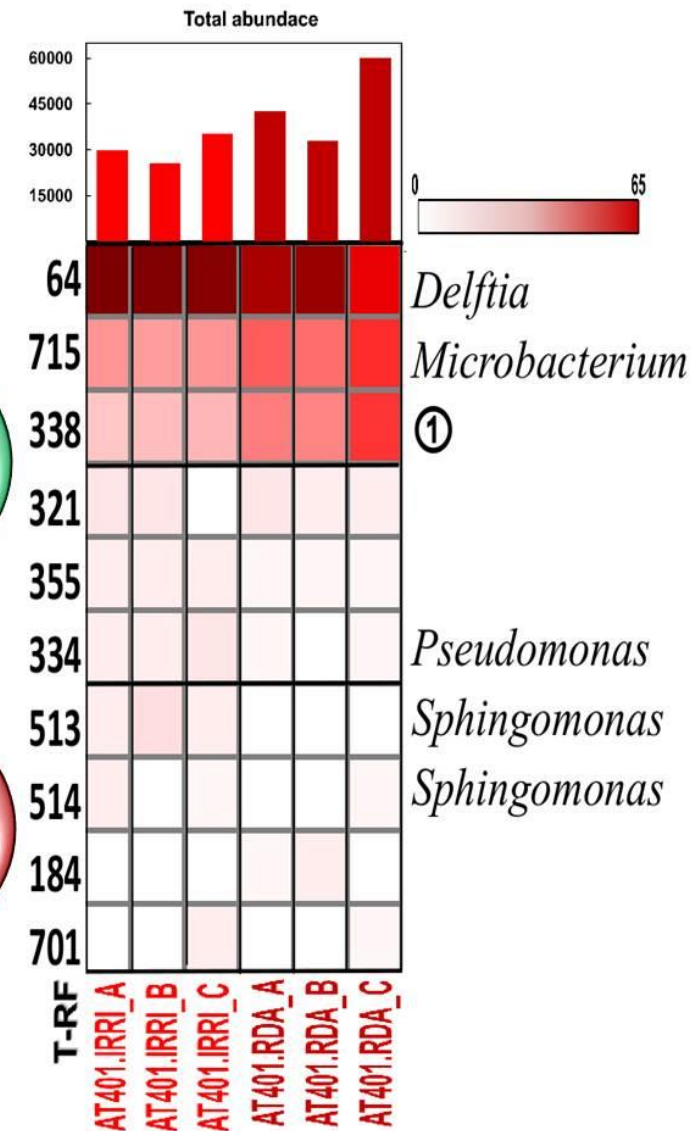

Supplement: MBO3-8-e00662-s003.pdf [file MBO3-8-e00662-s003.pdf]
